# Supplementary material for: Chimeric viruses between Rocio and West Nile: the role for Rocio prM-E proteins in virulence and inhibition of interferon-α/β signaling
Source: PubMed Central journal article supplement (PMC5357910; doi:10.1038/srep44642), 2017-03-20
Supplement: srep44642-s1.pdf [file srep44642-s1.pdf]

| Supplementary Information                                                                                                                                                                                                                                                   |               |                                                                       |                                                                       |                    |    |        |      |
|-----------------------------------------------------------------------------------------------------------------------------------------------------------------------------------------------------------------------------------------------------------------------------|---------------|-----------------------------------------------------------------------|-----------------------------------------------------------------------|--------------------|----|--------|------|
| Chimeric viruses between Rocio and West Nile: the role for Rocio prM-E proteins in virulence and inhibition of interferon- $\alpha/\beta$ signaling                                                                                                                         |               |                                                                       |                                                                       |                    |    |        |      |
| Alberto A Amarilla <sup>1</sup> , Yin X Setoh <sup>2</sup> , Parthiban Periasamy <sup>2</sup> , Nias Y Peng <sup>2</sup> , Gabor Pali <sup>2</sup> , Luiz T Figueiredo <sup>3</sup> , Alexander A Khromykh <sup>2*</sup> , Victor H Aquino <sup>1*<math>\&amp;</math></sup> |               |                                                                       |                                                                       |                    |    |        |      |
| <sup>1</sup> Laboratory of Virology, Department of Clinical Analyses, Toxicology and Food Sciences, School of Pharmaceutical Sciences of Ribeirao Preto, University of Sao Paulo, Ribeirao Preto, Sao Paulo, Brazil.                                                        |               |                                                                       |                                                                       |                    |    |        |      |
| <sup>2</sup> Australian Infectious Diseases Research Centre, School of Chemistry and Molecular Biosciences, The University of Queensland, St Lucia, Queensland, 4072, QLD, Australia.                                                                                       |               |                                                                       |                                                                       |                    |    |        |      |
| <sup>3</sup> Virology Research Center, School of Medicine of Ribeirao Preto, University of de Sao Paulo, Ribeirao Preto, Sao Paulo, Brazil.                                                                                                                                 |               |                                                                       |                                                                       |                    |    |        |      |
| * Corresponding authors: <a href="mailto:alexander.khromykh@uq.edu.au">alexander.khromykh@uq.edu.au</a> (AAK) and <a href="mailto:vhugo@fcrp.usp.br">vhugo@fcrp.usp.br</a> (VHA).                                                                                           |               |                                                                       |                                                                       |                    |    |        |      |
| <sup>†</sup> These authors contributed equally and should be considered as joint first authors.                                                                                                                                                                             |               |                                                                       |                                                                       |                    |    |        |      |
| <sup>&amp;</sup> These authors contributed equally and should be considered as joint senior authors                                                                                                                                                                         |               |                                                                       |                                                                       |                    |    |        |      |
| Supplementary Table 1. Primers used to amplify the overlapping cDNA fragments of ROCV, WNV and chimeric viruses.                                                                                                                                                            |               |                                                                       |                                                                       |                    |    |        |      |
| CPEC generated                                                                                                                                                                                                                                                              | Amplicon name | Primer name                                                           | Sequences (5' --> 3')                                                 | Amplicon Size (bp) | Tm | GC (%) | Size |
| ROCV                                                                                                                                                                                                                                                                        | ROCV-Linker   | ROCV-Linker-F                                                         | <b>CTGGTGCTGCAAAAACACAGGATCTGGGTCGGCATGGCATCTCCACCTC</b>              | 1032               | 61 | 50     | 24   |
|                                                                                                                                                                                                                                                                             |               | ROCV-Linker-R                                                         | <b>CTGTTGGTGAATTTACACAGGTGAATTTCTCGGTTCACTAAACGAGCTCTGCTTATATAGAC</b> |                    |    |        |      |
|                                                                                                                                                                                                                                                                             | 5'UTR-CprM-E  | ROCV-5'UTR-F                                                          | AGAAATTCACCTGTGTGAAATTCACCAACAG                                       | 2445               | 61 | 38     | 32   |
|                                                                                                                                                                                                                                                                             |               | ROCV-E-R                                                              | GGACGTTTCATGGCCAAAGAGAAG                                              |                    |    |        |      |
|                                                                                                                                                                                                                                                                             | NS1           | ROCV-NS1-F                                                            | CTTCTCTCTTGGCCATGAACGTCC                                              | 1119               | 61 | 52     | 25   |
|                                                                                                                                                                                                                                                                             |               | ROCV-NS1-R                                                            | CTGGAACCTGCAGATGTCGTTCC                                               |                    |    |        |      |
|                                                                                                                                                                                                                                                                             | NS2AB         | ROCV-NS2A-F                                                           | GGAAACGACATCTGCAGGTTCCAG                                              | 1093               | 61 | 54     | 24   |
|                                                                                                                                                                                                                                                                             |               | ROCV-NS2B-R                                                           | CTGGAAGTCCACAGAACACCAC                                                |                    |    |        |      |
|                                                                                                                                                                                                                                                                             | NS3           | ROCV-NS3-F                                                            | GTGGTGTCTGTGGACCTCCAG                                                 | 1853               | 62 | 58     | 24   |
|                                                                                                                                                                                                                                                                             |               | ROCV-NS3-R                                                            | CTTCCCGCCGCAAAATCTTTG                                                 |                    |    |        |      |
|                                                                                                                                                                                                                                                                             | NS4AB         | ROCV-NS4A-F                                                           | CAAAGAATTGCGGCGGGAAG                                                  | 1237               | 61 | 55     | 22   |
|                                                                                                                                                                                                                                                                             |               | ROCV-NS4B-R                                                           | CTTCACTTTCGGAGCTCCAGGTTT                                              |                    |    |        |      |
|                                                                                                                                                                                                                                                                             | NS5           | ROCV-NS5-F                                                            | GAACCTGGAAGTCCGAAAGTGAAG                                              | 2758               | 61 | 52     | 25   |
|                                                                                                                                                                                                                                                                             |               | ROCV-NS5-R                                                            | CTGGGCTGTTCAGTCTTACAGAACTCC                                           |                    |    |        |      |
| 3'UTR                                                                                                                                                                                                                                                                       | ROCV-3'UTR-F  | GGAGTCTGTAAGACTGAACAGCCAG                                             | 436                                                                   | 61                 | 52 | 27     |      |
|                                                                                                                                                                                                                                                                             | ROCV-3'UTR-R  | AGATCTGTGTTTGCAGCACCAG                                                |                                                                       |                    |    |        |      |
| ROCV/WNV-prME                                                                                                                                                                                                                                                               | 5'UTR-C       | ROCV-5'UTR-F                                                          | AGAAATTCACCTGTGTGAAATTCACCAACAG                                       | 473                | 61 | 38     | 32   |
|                                                                                                                                                                                                                                                                             |               | ROCV/WNV (WNV)                                                        | CTTCCCTGGAAAGTTGGAGAGAGTGACAGCCATTGATCCAGTCAACAAGCG                   |                    |    |        |      |
|                                                                                                                                                                                                                                                                             | prM-E         | WNV-prM-F                                                             | GTCACCTCTCCAACCTCCAGGGAAG                                             | 2004               | 61 | 52     | 27   |
|                                                                                                                                                                                                                                                                             |               | WNV-E-R                                                               | AGCATGCACGTTACGGAAAG                                                  |                    |    |        |      |
|                                                                                                                                                                                                                                                                             | NS1           | ROCV/WNV (ROCV)                                                       | CTTCCGTAACGTCATGCTGACACAGGATGCGCGATTGAC                               | 1110               | 72 | 55     | 42   |
|                                                                                                                                                                                                                                                                             |               | ROCV-NS1-R                                                            | CTGGAACCTGCAGATGTCGTTCC                                               |                    |    |        |      |
|                                                                                                                                                                                                                                                                             | NS2AB         | ROCV-NS2A-F                                                           | GGAAACGACATCTGCAGGTTCCAG                                              | 1093               | 61 | 54     | 24   |
|                                                                                                                                                                                                                                                                             |               | ROCV-NS2B-R                                                           | CTGGAAGTCCACAGAACACCAC                                                |                    |    |        |      |
|                                                                                                                                                                                                                                                                             | NS3A          | ROCV-NS3-F                                                            | GTGGTGTCTGTGGACCTCCAG                                                 | 760                | 62 | 58     | 24   |
|                                                                                                                                                                                                                                                                             |               | ROCV-NS3-A-R                                                          | CCGGAGTGTCTGCTTTGACGG                                                 |                    |    |        |      |
|                                                                                                                                                                                                                                                                             | NS3B          | ROCV-NS3-A-F                                                          | CCGTCAAAGCAGAACTCCGG                                                  | 1115               | 61 | 59     | 22   |
|                                                                                                                                                                                                                                                                             |               | ROCV-NS3-R                                                            | CTTCCCGCCGCAAAATCTTTG                                                 |                    |    |        |      |
|                                                                                                                                                                                                                                                                             | NS4AB         | ROCV-NS4A-F                                                           | CAAAGAATTGCGGCGGGAAG                                                  | 1237               | 61 | 55     | 22   |
|                                                                                                                                                                                                                                                                             |               | ROCV-NS4B-R                                                           | CTTCACTTTCGGAGCTCCAGGTTT                                              |                    |    |        |      |
|                                                                                                                                                                                                                                                                             | NS5           | ROCV-NS5-F                                                            | GAACCTGGAAGTCCGAAAGTGAAG                                              | 2758               | 61 | 52     | 25   |
|                                                                                                                                                                                                                                                                             |               | ROCV-NS5-R                                                            | CTGGGCTGTTCAGTCTTACAGAACTCC                                           |                    |    |        |      |
|                                                                                                                                                                                                                                                                             | 3'UTR         | ROCV-3'UTR-F                                                          | GGAGTCTGTAAGACTGAACAGCCAG                                             | 436                | 61 | 52     | 27   |
|                                                                                                                                                                                                                                                                             |               | ROCV-3'UTR-R                                                          | AGATCTGTGTTTGCAGCACCAG                                                |                    |    |        |      |
| ROCV-Linker                                                                                                                                                                                                                                                                 | ROCV-Linker-F | <b>CTGGTGCTGCAAAAACACAGGATCTGGGTCGGCATGGCATCTCCACCTC</b>              | 1032                                                                  | 61                 | 50 | 24     |      |
|                                                                                                                                                                                                                                                                             | ROCV-Linker-R | <b>CTGTTGGTGAATTTACACAGGTGAATTTCTCGGTTCACTAAACGAGCTCTGCTTATATAGAC</b> |                                                                       |                    |    |        |      |
| WNV/ROCV-prME                                                                                                                                                                                                                                                               | 5'UTR-C       | WNV-5'UTR-F                                                           | AGTAGTTCGCCTGTGTGAGCTG                                                | 448                | 60 | 55     | 22   |
|                                                                                                                                                                                                                                                                             |               | WNV-C-R                                                               | TGCTCCACGCCAGCAATCAG                                                  |                    |    |        |      |
|                                                                                                                                                                                                                                                                             | prM-E         | WNV/ROCV (ROCV)                                                       | CTGATTGCTGGCGTGGGAGCAGTCCGCTGGGACATATCAAG                             | 2055               | 75 | 60     | 43   |
|                                                                                                                                                                                                                                                                             |               | WNV/ROCV (WNV)                                                        | CCGACTTATATCTATGGCAGATCCAGTGTCCGATGGACGTTTCATGGCCAAGAAGAGAAG          |                    |    |        |      |
|                                                                                                                                                                                                                                                                             | NS1-NS2AB     | WNV-NS1-F                                                             | GACACTGGATGTCCATAGATATAAGTCGG                                         | 2142               | 61 | 47     | 30   |
|                                                                                                                                                                                                                                                                             |               | WNV-NS2B-R                                                            | CTCCTCTCTTTGTGATTTGGAGATTATC                                          |                    |    |        |      |
|                                                                                                                                                                                                                                                                             | NS3           | WNV-NS3-F                                                             | GATAACTCTCAATACAAAAGAGAGGAG                                           | 1875               | 57 | 41     | 29   |
|                                                                                                                                                                                                                                                                             |               | WNV-NS3-R                                                             | CCTGAGGCGAAGTCTTTGAA                                                  |                    |    |        |      |
|                                                                                                                                                                                                                                                                             | NS4AB         | WNV-NS4A-F                                                            | TTCAAAGACTTCGCCTCAGG                                                  | 1256               | 55 | 50     | 20   |
|                                                                                                                                                                                                                                                                             |               | WNV-NS4B-R                                                            | CGTCCTTTTGCACCCTC                                                     |                    |    |        |      |
|                                                                                                                                                                                                                                                                             | NS5           | WNV-NS5-F                                                             | GAGGTGGGCAAAAGGACG                                                    | 2712               | 59 | 63     | 19   |
|                                                                                                                                                                                                                                                                             |               | WNV-NS5-R                                                             | CTGTATCTCAACAAATGTCGTGTTCTC                                           |                    |    |        |      |
|                                                                                                                                                                                                                                                                             | 3'UTR         | WNV-3'UTR-F                                                           | GAAGACACGACATTTGTTGAGGATACAG                                          | 664                | 59 | 43     | 28   |
|                                                                                                                                                                                                                                                                             |               | WNV-3'UTR-R                                                           | TCCTGTGTTCTCGCACCAC                                                   |                    |    |        |      |
| WNV-Linker                                                                                                                                                                                                                                                                  | WNV-Linker-F  | GTGGTGCGAGAACACAGGA                                                   | 1076                                                                  | 58                 | 58 | 19     |      |
|                                                                                                                                                                                                                                                                             | WNV-Linker-R  | CAGCTCACAGGCGAACTACT                                                  |                                                                       |                    |    |        |      |

**ROCV-Linker-F:** containig last nucleotides from ROCV (Bold sequences) and first nucleotides of HDVr sequences (underlined letters)

**ROCV-Linker-R:** containig first nucleotides from ROCV (Bold sequences) and last nucleotides of CMV promotor sequences (underlined letters)
