# Supplementary material for: Chimeric viruses between Rocio and West Nile: the role for Rocio prM-E proteins in virulence and inhibition of interferon-α/β signaling
Source: PubMed Central journal article supplement (PMC5357910; doi:10.1038/srep44642), 2017-03-20
Supplement: srep44642-s2.pdf [file srep44642-s2.pdf]

| Supplementary Information                                                                                                                                                                                                                                 |                         |                                                                                                                                                                                                  |                                |                                                                                                                      |                                |                                                                                                                                                                                                                                                 |                                                                                                                                                         |
|-----------------------------------------------------------------------------------------------------------------------------------------------------------------------------------------------------------------------------------------------------------|-------------------------|--------------------------------------------------------------------------------------------------------------------------------------------------------------------------------------------------|--------------------------------|----------------------------------------------------------------------------------------------------------------------|--------------------------------|-------------------------------------------------------------------------------------------------------------------------------------------------------------------------------------------------------------------------------------------------|---------------------------------------------------------------------------------------------------------------------------------------------------------|
| <b>Chimeric viruses between Rocio and West Nile: the role for Rocio prM-E proteins in virulence and inhibition of interferon-<math>\alpha/\beta</math> signaling</b>                                                                                      |                         |                                                                                                                                                                                                  |                                |                                                                                                                      |                                |                                                                                                                                                                                                                                                 |                                                                                                                                                         |
| Alberto A Amarilla <sup>1</sup> , Yin X Setoh <sup>2</sup> , Parthiban Periasamy <sup>2</sup> , Nias Y Peng <sup>2</sup> , Gabor Pali <sup>2</sup> , Luiz T Figueiredo <sup>3</sup> , Alexander A Khromykh <sup>2*</sup> , Victor H Aquino <sup>1,*</sup> |                         |                                                                                                                                                                                                  |                                |                                                                                                                      |                                |                                                                                                                                                                                                                                                 |                                                                                                                                                         |
| <sup>1</sup> Laboratory of Virology, Department of Clinical Analyses, Toxicology and Food Sciences, School of Pharmaceutical Sciences of Ribeirao Preto, University of Sao Paulo, Ribeirao Preto, Sao Paulo, Brazil.                                      |                         |                                                                                                                                                                                                  |                                |                                                                                                                      |                                |                                                                                                                                                                                                                                                 |                                                                                                                                                         |
| <sup>2</sup> Australian Infectious Diseases Research Centre, School of Chemistry and Molecular Biosciences, The University of Queensland, St Lucia, Queensland, 4072, QLD, Australia.                                                                     |                         |                                                                                                                                                                                                  |                                |                                                                                                                      |                                |                                                                                                                                                                                                                                                 |                                                                                                                                                         |
| <sup>3</sup> Virology Research Center, School of Medicine of Ribeirao Preto, University of de Sao Paulo, Ribeirao Preto, Sao Paulo, Brazil.                                                                                                               |                         |                                                                                                                                                                                                  |                                |                                                                                                                      |                                |                                                                                                                                                                                                                                                 |                                                                                                                                                         |
| * Corresponding authors: <a href="mailto:alexander.khromykh@uq.edu.au">alexander.khromykh@uq.edu.au</a> (AAK) and <a href="mailto:yhugo@fcfrp.usp.br">yhugo@fcfrp.usp.br</a> (VHA).                                                                       |                         |                                                                                                                                                                                                  |                                |                                                                                                                      |                                |                                                                                                                                                                                                                                                 |                                                                                                                                                         |
| *These authors contributed equally and should be considered as joint first authors.                                                                                                                                                                       |                         |                                                                                                                                                                                                  |                                |                                                                                                                      |                                |                                                                                                                                                                                                                                                 |                                                                                                                                                         |
| *These authors contributed equally and should be considered as joint senior authors                                                                                                                                                                       |                         |                                                                                                                                                                                                  |                                |                                                                                                                      |                                |                                                                                                                                                                                                                                                 |                                                                                                                                                         |
| <b>Supplementary Table 1. Deep sequencing analysis of the recovered ROCV and respective chimeric viruses (ROCV/WNV-prME and WNV/ROCV-prME).</b>                                                                                                           |                         |                                                                                                                                                                                                  |                                |                                                                                                                      |                                |                                                                                                                                                                                                                                                 |                                                                                                                                                         |
| Residues denoted in green correspond to the differences found between recovered ROCV and respective chimeric viruses.                                                                                                                                     |                         |                                                                                                                                                                                                  |                                |                                                                                                                      |                                |                                                                                                                                                                                                                                                 |                                                                                                                                                         |
| Residue A111 and A66 denoted in red in C and NS2A genes respectively, correspond to the differences between the recovered ROCV and ROCV/WNV-prME.                                                                                                         |                         |                                                                                                                                                                                                  |                                |                                                                                                                      |                                |                                                                                                                                                                                                                                                 |                                                                                                                                                         |
| The substitution, N89, in E gene denoted in blue contains mixed bases in both recovered ROCV and WNV/ROCV-prME, however, the predominant population is the same in both viruses and this is not a glycosylation site.                                     |                         |                                                                                                                                                                                                  |                                |                                                                                                                      |                                |                                                                                                                                                                                                                                                 |                                                                                                                                                         |
| ROCV                                                                                                                                                                                                                                                      |                         |                                                                                                                                                                                                  |                                |                                                                                                                      |                                |                                                                                                                                                                                                                                                 |                                                                                                                                                         |
| C                                                                                                                                                                                                                                                         | prM                     | E                                                                                                                                                                                                | NS2A                           | NS3                                                                                                                  | NS4A                           | NS5                                                                                                                                                                                                                                             | 3' UTR                                                                                                                                                  |
| A111 (GCG) 98% G                                                                                                                                                                                                                                          | N47K (AAT -> AAA) 99% A | N89 (AAC) 30% A<br>N89S (AAC -> AGC) 68% G                                                                                                                                                       | A66 (GCC) 98% C                | S157S (TCC -> TCA) 97% A<br>H158S (CAC -> AGC) 97% A & 98% G<br>S225T (AGT -> ACT) 98% C<br>E575E (GAA -> GAG) 98% G | A134A (GCC -> GCA) 96% A, 3% C | A71V (GCT -> GTT) 97% T, 2% G<br>I123I (ATT -> ATC) 98% C<br>Q337Q (CAA -> CAG) 98% G<br>A373V (GCG -> GTG) 96% T, 3% G<br>F435C (TTT -> CTC) 97% C & 97% C<br>I452I (ATT -> ATC) 98% C<br>T660S (ACT -> AGT) 99% G<br>P661R (CCG -> CGG) 99% G | Ni 27 (G -> A) 96% A<br>Ni 121 (A -> T) 96% T, 2% G<br>Ni 141 (T -> A) 99% A<br>Ni 194 (T -> A) 99% A<br>Ni 200 (T -> C) 99% C<br>Ni 219 (A -> C) 99% C |
| ROCV/WNV-prME                                                                                                                                                                                                                                             |                         |                                                                                                                                                                                                  |                                |                                                                                                                      |                                |                                                                                                                                                                                                                                                 |                                                                                                                                                         |
| C                                                                                                                                                                                                                                                         | prM                     | E                                                                                                                                                                                                | NS2A                           | NS3                                                                                                                  | NS4A                           | NS5                                                                                                                                                                                                                                             | 3' UTR                                                                                                                                                  |
| A111S (GCG -> TCG) 70% T, 27% G                                                                                                                                                                                                                           |                         |                                                                                                                                                                                                  | A66A (GCC -> GCT) 62% T, 36% C | S157S (TCC -> TCA) 97% A<br>H158S (CAC -> AGC) 98% A & 99% G<br>S225T (AGT -> ACT) 99% C<br>E575E (GAA -> GAG) 99% G | A134A (GCC -> GCA) 99% A       | A71V (GCT -> GTT) 97% T<br>I123I (ATT -> ATC) 99% C<br>Q337Q (CAA -> CAG) 99% G<br>A373V (GCG -> GTG) 96% T<br>F435C (TTT -> CTC) 98% C1 & 99% C3<br>I452I (ATT -> ATC) 98% C<br>T660S (ACT -> AGT) 99% G<br>P661R (CCG -> CGG) 99% G           | Ni 27 (G -> A) 99% A<br>Ni 121 (A -> T) 98% T<br>Ni 141 (T -> A) 99% A<br>Ni 194 (T -> A) 99% A<br>Ni 200 (T -> C) 99% C<br>Ni 219 (A -> C) 98% C       |
| WNV/ROCV-prME                                                                                                                                                                                                                                             |                         |                                                                                                                                                                                                  |                                |                                                                                                                      |                                |                                                                                                                                                                                                                                                 |                                                                                                                                                         |
| C                                                                                                                                                                                                                                                         | prM                     | E                                                                                                                                                                                                | NS2A                           | NS3                                                                                                                  | NS4A                           | NS5                                                                                                                                                                                                                                             | 3' UTR                                                                                                                                                  |
|                                                                                                                                                                                                                                                           | N47K (AAT -> AAA) 98% A | N89 (AΔC) 46% A<br>N89S (AAC -> AGC) 52% G                                                                                                                                                       |                                |                                                                                                                      |                                |                                                                                                                                                                                                                                                 |                                                                                                                                                         |
|                                                                                                                                                                                                                                                           |                         | Y235N (TAC -> AAC) 90% A<br>V247A (GTT -> GCT) 99% C<br>E261A (GAA -> GCA) 98% C<br>I264T (ATT -> ACT) 99% C<br>V265A (GTT -> GCT) 99% C<br>L279L (TTA -> CTA) 99% C<br>K409K (AAA -> AAG) 99% G |                                |                                                                                                                      |                                |                                                                                                                                                                                                                                                 |                                                                                                                                                         |
